# Supplementary material
Source: HighWire-hosted journal article supplement (https://www.cmajopen.ca/highwire/filestream/81303/field_highwire_adjunct_files/0/2018-0203-1-at.pdf)
Supplement: 2018-0203-1-at.pdf [file 2018-0203-1-at.pdf]

## Appendix 1 (as supplied by the authors): Data dictionary

| Variable Name       | Description                                                                                                                | Source Data            | Acceptable values                            |
|---------------------|----------------------------------------------------------------------------------------------------------------------------|------------------------|----------------------------------------------|
| Case ID             | Unique case number assigned to each ENDS-related call to the British Columbia Drug and Poison Information Centre           | Coded field            | --                                           |
| Call date           | Date of the initial call regarding an ENDS exposure was made to the British Columbia Drug and Poison Information Centre    | Coded field            | --                                           |
| Time of last call   | Time of the final call regarding the ENDS exposure made to the British Columbia Drug and Poison Information Centre         | Free text              | --                                           |
| Time of first call  | Time that the initial call regarding the ENDS exposure was made to the British Columbia Drug and Poison Information Centre | Free text              | --                                           |
| Time since exposure | Time elapsed since the ENDS exposure                                                                                       | Coded field, free text | --                                           |
| Qualitative amount  | Qualitative description of amount of the ENDS substance to which the exposed person was exposed                            | Free text              | --                                           |
| Sex                 | Sex of the exposed person exposed to ENDS                                                                                  | Coded field            | Female<br>Male<br>Pregnant female<br>Unknown |
| Age                 | Age of the exposed person exposed to ENDS                                                                                  | Coded field, free text | --                                           |
| City                | Location from which the ENDS call originated                                                                               | Coded field            | --                                           |
| Caller type         | Relationship of the caller with the exposed individual                                                                     | Coded field, free text | Self<br>Family member<br>Friend              |

|               |                                                                                                 |                        |                                                                                                                                                                                       |
|---------------|-------------------------------------------------------------------------------------------------|------------------------|---------------------------------------------------------------------------------------------------------------------------------------------------------------------------------------|
|               |                                                                                                 |                        | Health Care Provider<br>Unknown                                                                                                                                                       |
| Exposure type | ENDS device, container, or substance to which the individual was exposed                        | Coded field, free text | E-cigarette device<br>E-cigarette cartridge<br>E-juice/E-liquid<br>Other<br>Unknown                                                                                                   |
| Exposure site | Physical site or location where the ENDS exposure took place                                    | Coded field, free text | Health care facility<br>Own residence<br>Other residence<br>Public area<br>Restaurant<br>School<br>Workplace<br>Other<br>Unknown                                                      |
| Source        | Owner or source of the ENDS device, container, or substance to which the individual was exposed | Free text              | Self<br>Household (family member or other member of household)<br>Non-household (person is known to the exposed person but lives outside of his or her household)<br>Found<br>Unknown |
| Nicotine      | Known exposure to nicotine                                                                      | Free text              | Yes<br>No<br>Unknown                                                                                                                                                                  |
| Concentration | Concentration of nicotine in the ENDS product to which the individual was exposed (mg/mL)       | Free text              | --                                                                                                                                                                                    |
| Amount        | Total amount of nicotine to which the individual was estimated to be exposed (mg/kg)            | Free text              | --                                                                                                                                                                                    |
| Flavour       | Known exposure to a flavoured ENDS product                                                      | Free text              | Tobacco<br>Menthol<br>Sweet (candy/dessert)<br>Beverage<br>Fruit<br>Flavouring not otherwise specified                                                                                |

|                   |                                                                            |                        |                                                                                                                                                                                                                                                                                        |
|-------------------|----------------------------------------------------------------------------|------------------------|----------------------------------------------------------------------------------------------------------------------------------------------------------------------------------------------------------------------------------------------------------------------------------------|
|                   |                                                                            |                        | No Flavour<br>Unknown                                                                                                                                                                                                                                                                  |
| Cause of exposure | Circumstances in which the ENDS exposure occurred                          | Free text              | Device malfunction<br>Handling device (e.g. cleaning, refilling)<br>Making or diluting E-liquid/E-juice<br>Accidental access, intentional use (e.g. child)<br>Misuse/Mistaken identity (e.g. eye drops)<br>Spill not otherwise specified<br>Usual use<br>Unknown<br>Intentional misuse |
| Exposure route    | Route of exposure                                                          | Coded field, free text | Inhalation<br>Ingestion<br>Ocular<br>Dermal<br>Other mucosal<br>Parenteral<br>Unknown                                                                                                                                                                                                  |
| Coingestions      | Substances ingested within the same time frame as the ENDS exposure        | Coded field, free text | --                                                                                                                                                                                                                                                                                     |
| Symptoms          | Symptoms experienced following ENDS exposure                               | Free text              | --                                                                                                                                                                                                                                                                                     |
| System            | Body system which manifested symptoms following ENDS exposure              | Free text              | Gastrointestinal<br>Neurological<br>Respiratory<br>Cardiovascular<br>Renal<br>Oral<br>Ophthalmological<br>Other                                                                                                                                                                        |
| Patient flow      | Site or facility where ENDS exposure or attributable symptoms were managed | Coded field            | Managed on site<br>Enroute to health care facility<br>Referred to health care facility                                                                                                                                                                                                 |
| Hospital flow     | Description of level of care/health care facility where exposed            | Coded field            | Treated/evaluated and released                                                                                                                                                                                                                                                         |

|           |                                                                                                                                                                                                                                                     |           |                                                                                            |
|-----------|-----------------------------------------------------------------------------------------------------------------------------------------------------------------------------------------------------------------------------------------------------|-----------|--------------------------------------------------------------------------------------------|
|           | person was treated if he or she was referred to health care facility                                                                                                                                                                                |           | Admitted to noncritical care unit<br>Admitted to critical care unit<br>Deceased<br>Unknown |
| Callbacks | Number of callbacks which occurred following the initial ENDS call to the British Columbia Drug and Poison Information Centre, whether initiated by the caller, exposed person, or staff at the British Columbia Drug and Poison Information Centre | Free text | --                                                                                         |
